# Supplementary material for: Identification of candidate regulatory SNPs by combination of transcription-factor-binding site prediction, SNP genotyping and haploChIP
Source: PubMed Central journal article supplement — Nucleic Acids Res. 2009 May 18;37(12):e85. doi: 10.1093/nar/gkp381 (PMC2709586; doi:10.1093/nar/gkp381), 2009-05-18
Supplement: gkp381_3.pdf [file gkp381_3.pdf]

| chr   | SNPpos    | strand | ref sequence | SNPobs | SNPclass | SNPavHet   | SNPname    | ChIP-chip signal (log2) |
|-------|-----------|--------|--------------|--------|----------|------------|------------|-------------------------|
| chr11 | 18300647  | -      | GGCACGTGACTC | T/C    | single   | 0.0115603  | rs4150534  | 3.362                   |
| chr12 | 56432464  | +      | GGCACGTGACCG | T/C    | single   | 0.00628925 | rs2069500  | 3.26                    |
| chr1  | 77921248  | -      | CCCACGTGACGG | T/G    | single   | 0          | rs12040261 | 3.236                   |
| chr2  | 208284359 | -      | GGCACGTGACCT | T/C    | single   | 0          | rs28579258 | 3.151                   |
| chr5  | 1853000   | -      | GCCACGTGACCC | C/A    | single   | 0          | rs6873799  | 2.933                   |
| chr12 | 112888526 | -      | GCCACGTGACTG | G/A    | single   | 0.150102   | rs2290798  | 2.733                   |
| chr19 | 50373622  | +      | TACACGTGACAT | A/C    | single   | 0          | rs7249681  | 2.686                   |
| chr19 | 45546272  | +      | ATCACGTGACCG | C/T    | single   | 0          | rs11667768 | 2.526                   |
| chr11 | 66915924  | +      | GTCACGTGACGG | C/T    | single   | 0.0110494  | rs887317   | 2.456                   |
| chr11 | 66915924  | -      | GTCACGTGACGG | G/A    | single   | 0.0110494  | rs887317   | 2.456                   |
| chr21 | 37515531  | +      | GTCACGTGACCA | C/T    | single   | 0          | rs17852704 | 2.217                   |
| chr21 | 37515531  | -      | GTCACGTGACCA | G/A    | single   | 0          | rs17852704 | 2.217                   |
| chr10 | 133855098 | -      | ACCACGTGACCA | T/C    | single   | 0          | rs11146242 | 2.104                   |
| chr10 | 133855316 | -      | ACCACGTGACCA | G/A    | single   | 0          | rs4880345  | 2.104                   |
| chr10 | 133855043 | -      | ACCATGTGACCA | T/C    | single   | 0          | rs11146241 | 2.104                   |
| chr10 | 133855426 | -      | ACCATGTGACCA | T/C    | single   | 0          | rs12264644 | 2.104                   |
| chr10 | 133854933 | -      | ACCACATGACCA | G/A    | single   | 0          | rs11146238 | 2.104                   |
| chr10 | 133854602 | -      | ACCACGTGGCCA | G/A    | single   | 0          | rs11597318 | 2.104                   |
| chr16 | 69337650  | -      | AACACGTGACAC | G/C    | single   | 0          | rs7499478  | 2.02                    |
| chr4  | 23748779  | -      | CTCACGTGACCT | T/C    | single   | 0.417117   | rs16875109 | 1.995                   |
| chr10 | 759225    | +      | GTCACGTGACAT | C/T    | single   | 0          | rs11253357 | 1.924                   |
| chr10 | 759381    | +      | GTCACGTGACAT | C/T    | single   | 0          | rs7085733  | 1.924                   |
| chr10 | 759459    | +      | GTCACGTGACAT | C/T    | single   | 0          | rs11253359 | 1.924                   |
| chr10 | 759460    | +      | GTCACGTGACAT | A/G    | single   | 0          | rs9419465  | 1.924                   |
| chr10 | 759849    | +      | GTCACGTGACAT | C/T    | single   | 0          | rs35624899 | 1.924                   |
| chr10 | 759225    | -      | GTCACGTGACGC | G/A    | single   | 0          | rs11253357 | 1.924                   |
| chr10 | 759381    | -      | GTCACGTGACGC | G/A    | single   | 0          | rs7085733  | 1.924                   |
| chr10 | 759459    | -      | GTCACGTGACGC | G/A    | single   | 0          | rs11253359 | 1.924                   |
| chr10 | 759460    | -      | GTCACGTGACGC | T/C    | single   | 0          | rs9419465  | 1.924                   |
| chr10 | 759849    | -      | GTCACGTGACGC | G/A    | single   | 0          | rs35624899 | 1.924                   |
| chr10 | 759148    | -      | GTCATGTGACGT | T/C    | single   | 0          | rs7092142  | 1.924                   |
| chr10 | 759304    | -      | GTCATGTGACGT | T/C    | single   | 0          | rs1769229  | 1.924                   |
| chr10 | 759148    | +      | GTCACATGACAG | A/G    | single   | 0          | rs7092142  | 1.924                   |
| chr10 | 759304    | +      | GTCACATGACAG | A/G    | single   | 0          | rs1769229  | 1.924                   |
| chr20 | 48491777  | +      | GTCACGTGACCA | T/C    | single   | 0          | rs2012234  | 1.898                   |

|       |             |              |     |           |            |            |       |
|-------|-------------|--------------|-----|-----------|------------|------------|-------|
| chr20 | 48491777 -  | GTCACGTGACCC | A/G | single    | 0          | rs2012234  | 1.898 |
| chr10 | 123863315 + | AACACGTGACCC | G/A | single    | 0          | rs4074577  | 1.817 |
| chr16 | 30364851 -  | AGCACGTGACGT | G/A | single    | 0.598468   | rs4787645  | 1.736 |
| chr12 | 51932152 -  | ATCACGTGACGG | G/A | single    | 0.388002   | rs7398691  | 1.733 |
| chr12 | 51932152 +  | GTCACGTGATGA | C/T | single    | 0.388002   | rs7398691  | 1.733 |
| chr2  | 11428289 +  | GTCACGTGACCC | C/T | single    | 0          | rs6719739  | 1.709 |
| chr2  | 11428289 -  | GTCACGTGACCA | G/A | single    | 0          | rs6719739  | 1.709 |
| chr17 | 32380216 -  | GGCACGTGACCG | A/G | single    | 0          | rs3760438  | 1.695 |
| chr17 | 33043649 +  | CCCACGTGACTC | A/C | single    | 0          | rs9903237  | 1.69  |
| chr3  | 40326144 -  | CCCACGTGACCG | G/C | single    | 0.109143   | rs5004340  | 1.646 |
| chr16 | 87004580 -  | ACCACGTGACTT | G/C | single    | 0          | rs12598293 | 1.638 |
| chr12 | 127092644 + | CCCACGTGACCC | A/G | single    | 0          | rs34773244 | 1.637 |
| chr12 | 127092665 + | CCCACGTGACCC | C/T | single    | 0          | rs35759045 | 1.637 |
| chr12 | 127092666 + | CCCACGTGACCC | C/G | single    | 0          | rs34661350 | 1.637 |
| chr14 | 90650709 -  | TTCATGTGACCT | C/T | single    | 0.0809363  | rs941677   | 1.63  |
| chr1  | 1430439 -   | CCCACGTGACCT | T/C | single    | 0          | rs2313192  | 1.571 |
| chr3  | 40326144 -  | CCCACGTGACCG | G/C | single    | 0.109143   | rs5004340  | 1.509 |
| chr12 | 110935580 - | GTCACGTGACTG | -/G | insertion | 0          | rs3832865  | 1.504 |
| chr19 | 6487300 +   | GACACGTGACTT | A/G | single    | 0          | rs10426436 | 1.424 |
| chr17 | 33043649 +  | CCCACGTGACTC | A/C | single    | 0          | rs9903237  | 1.419 |
| chr5  | 72876429 +  | GTCACGTGACAT | A/G | single    | 0          | rs12658213 | 1.403 |
| chr5  | 72876429 -  | GTCACGTGACTG | T/C | single    | 0          | rs12658213 | 1.403 |
| chr17 | 3491861 -   | ATCACGTGACCA | C/T | single    | 0          | rs606377   | 1.396 |
| chr16 | 68764967 -  | CCAACGTGACTA | C/A | single    | 0          | rs2650538  | 1.374 |
| chr6  | 167643161 + | CACATGTGACCT | C/T | single    | 0.00604224 | rs678417   | 1.357 |
| chr16 | 73013406 +  | CCCACGTGACTA | C/A | single    | 0          | rs2650538  | 1.332 |
| chr2  | 234333567 - | GTCACGTGACTA | G/A | single    | 0          | rs34547608 | 1.297 |
| chr2  | 113639545 + | AACACGTGACCC | T/C | single    | 0.3848     | rs1867760  | 1.289 |
| chr6  | 24883160 -  | ACCACGTGACCA | C/A | single    | 0.253954   | rs2754775  | 1.28  |
| chr4  | 164691014 - | GTCACGTGACTG | -/T | deletion  | 0          | rs11363784 | 1.27  |
| chr2  | 25274369 +  | AAAACGTGACCA | A/C | single    | 0.329176   | rs10202360 | 1.233 |
| chr20 | 48496520 +  | GACGCGTGACTT | A/G | single    | 0.182956   | rs11696955 | 1.185 |
| chr2  | 118671739 + | TGCACGTGACAC | C/T | single    | 0          | rs13423754 | 1.174 |
| chrX  | 152682420 - | TGGACGTGACAT | G/C | single    | 0          | rs5945347  | 1.143 |
| chr10 | 44680600 -  | CCCACGTGACAC | G/C | single    | 0          | rs10751359 | 1.128 |
| chr15 | 48798370 +  | TTCACGTGTCAA | A/T | single    | 0.427555   | rs9920753  | 1.102 |

|       |               |              |           |           |           |              |       |
|-------|---------------|--------------|-----------|-----------|-----------|--------------|-------|
| chr8  | 1396675 -     | CCCACGTGACAG | G/A       | single    |           | 0 rs12542079 | 1.099 |
| chr16 | 2896784 -     | CCCACGTGACGT | G/C       | single    |           | 0 rs2107217  | 1.097 |
| chr4  | 190843270-1 + | TTCACGTGACAT | (LARGEDEI | named     |           | 0 rs35557021 | 1.092 |
| chr4  | 190843270-1 + | CTCACGTGACAT | (LARGEDEI | named     |           | 0 rs35557021 | 1.092 |
| chr4  | 190843459 +   | CTCACGTGACAT | C/T       | single    |           | 0 rs28695897 | 1.092 |
| chr4  | 190843270-1 + | CTCACGTGACAT | (LARGEDEI | named     |           | 0 rs35557021 | 1.092 |
| chr4  | 190843516 +   | CTCACGTGACAT | C/T       | single    |           | 0 rs10004185 | 1.092 |
| chr4  | 190843733 +   | CTCATGTGACAT | C/T       | single    |           | 0 rs5009701  | 1.092 |
| chr4  | 190843625 +   | CTCACGCGACAT | C/T       | single    |           | 0 rs34871567 | 1.092 |
| chr16 | 68542055 -    | CCCACGTGACTA | C/A       | single    |           | 0 rs2650538  | 1.049 |
| chr16 | 1465059 +     | GCCACGTGACGC | C/T       | single    |           | 0 rs2223577  | 1.047 |
| chr16 | 1465061 +     | GCCACGTGACGC | A/C       | single    |           | 0 rs2223578  | 1.047 |
| chrY  | 1470637 +     | GTCACGTGACGC | C/T       | single    |           | 0 rs6644605  | 1.034 |
| chrY  | 1470637 -     | GTCACGTGACCG | G/A       | single    |           | 0 rs6644605  | 1.034 |
| chr19 | 17379292 -    | CCCACGTGACCT | G/A       | single    |           | 0 rs7257715  | 1.019 |
| chr21 | 36278921 -    | GGCACGTGACCT | G/A       | single    |           | 0 rs28665789 | 1.012 |
| chr21 | 36278926 -    | GGCACGTGACCT | -/G       | insertion |           | 0 rs34771079 | 1.012 |
| chr4  | 140800489 +   | GGCACGTGACAC | C/T       | single    |           | 0 rs12650833 | 0.99  |
| chr16 | 70815782 +    | ACCACGTGACTT | C/T       | single    | 0.165289  | rs10492817   | 0.975 |
| chr16 | 56506044 +    | ATCACGTGACAG | G/T       | single    | 0.263512  | rs4555144    | 0.971 |
| chr1  | 94269537 +    | GTCACGTGACTC | T/C       | single    |           | 0 rs4147842  | 0.956 |
| chr1  | 94269537 -    | GTCACGTGACTT | A/G       | single    |           | 0 rs4147842  | 0.956 |
| chr5  | 1342300 +     | TACACGTGACAG | G/A       | single    |           | 0 rs2853673  | 0.952 |
| chr5  | 1342510 +     | TGCACGTGACAG | A/G       | single    |           | 0 rs35467152 | 0.952 |
| chr5  | 1342552 +     | TACACGTGACAG | A/G       | single    |           | 0 rs35121132 | 0.952 |
| chr5  | 1342553 +     | TACACGTGACAG | A/C       | single    |           | 0 rs35849820 | 0.952 |
| chr5  | 1342594 +     | TACACGTGACAG | A/G       | single    |           | 0 rs35252439 | 0.952 |
| chr16 | 82769470 +    | AAAACGTGACCA | C/A       | single    | 0.474902  | rs3208968    | 0.949 |
| chr8  | 48188424 -    | TTCACGTGACCA | T/C       | single    |           | 0 rs1061530  | 0.948 |
| chr9  | 125128989 +   | GTCACGTGACAA | A/G       | single    | 0.282251  | rs7873175    | 0.942 |
| chr9  | 125128989 -   | GTCACGTGACCT | T/C       | single    | 0.282251  | rs7873175    | 0.942 |
| chr16 | 83177135 +    | TGCACGTGACCC | A/C       | single    | 0.109221  | rs2967854    | 0.936 |
| chr22 | 27883955 -    | ACCATGTGACCT | T/C       | single    | 0.0915311 | rs132294     | 0.931 |
| chr10 | 70553955 +    | GTCACGTGACGG | A/G       | single    |           | 0 rs10998587 | 0.925 |
| chr7  | 45822827 +    | CTCACGTGACTC | C/T       | single    |           | 0 rs34841685 | 0.919 |
| chr19 | 56547627 +    | CCCATGTGACCA | C/T       | single    |           | 0 rs10402844 | 0.915 |

|       |             |              |     |           |           |            |       |
|-------|-------------|--------------|-----|-----------|-----------|------------|-------|
| chr1  | 211853665 + | TGCACGTGACCA | A/G | single    | 0.104938  | rs11120171 | 0.914 |
| chr1  | 241282031 - | CTCACGTGACTC | T/C | single    | 0         | rs9729605  | 0.913 |
| chr19 | 1226987 -   | ACCACGTGACGA | G/C | single    | 0         | rs12979308 | 0.901 |
| chr3  | 187519147 - | CTCACGTGACAT | A/G | single    | 0.341157  | rs1544702  | 0.899 |
| chr7  | 13997720 -  | ACCACGTGACCA | T/C | single    | 0.0756841 | rs7806055  | 0.899 |
| chr3  | 13435612 -  | ACCACGTGACAG | G/C | single    | 0         | rs2655256  | 0.896 |
| chr4  | 2390927 +   | CACACGTGGCCT | G/A | single    | 0.324965  | rs1203792  | 0.885 |
| chr10 | 38782404 +  | CTCATGTGACTC | C/T | single    | 0         | rs4006892  | 0.883 |
| chr16 | 83804696 -  | GACACGTGACAC | A/G | single    | 0.222159  | rs4072154  | 0.87  |
| chr10 | 134807838 + | GACACGTGACTC | A/G | single    | 0         | rs11598465 | 0.862 |
| chr10 | 134807843 + | GACACGTGACTC | G/T | single    | 0         | rs11592855 | 0.862 |
| chr12 | 123990574 - | ACCACGTGACTG | T/C | single    | 0         | rs7137742  | 0.86  |
| chr6  | 149808556 + | TGCACGTGACCC | T/G | single    | 0         | rs409099   | 0.849 |
| chr22 | 37138641 +  | GCCACGTGACCT | A/C | single    | 0         | rs5750603  | 0.839 |
| chr4  | 15678591 +  | GCCACGTGACTC | C/T | single    | 0         | rs28698293 | 0.795 |
| chr16 | 86574564 +  | GGCACGTGACTG | C/G | single    | 0         | rs11639761 | 0.793 |
| chr2  | 228452162 + | AACACGTGACAG | A/G | single    | 0.499592  | rs12472908 | 0.792 |
| chr22 | 29332795 +  | CTCACGTGACCA | -/T | insertion | 0         | rs35245021 | 0.788 |
| chr10 | 13042798 -  | AGCACGTGACCT | G/A | single    | 0         | rs11258089 | 0.781 |
| chr9  | 129917593 + | GCCACGTGACCT | C/T | single    | 0         | rs10987882 | 0.773 |
| chr16 | 48973407 +  | GACGCGTGACTT | G/A | single    | 0         | rs1861547  | 0.766 |
| chr1  | 40930745 +  | CCCAAGTGACAG | C/A | single    | 0.416584  | rs657149   | 0.764 |
| chr12 | 100201179 - | GACACGTGACAG | G/A | single    | 0.0139853 | rs17413303 | 0.758 |
| chr22 | 24145583 -  | TCCACGTGACAC | T/C | single    | 0         | rs6004643  | 0.753 |
| chr1  | 241282031 - | CTCACGTGACTC | T/C | single    | 0         | rs9729605  | 0.745 |
| chr22 | 17060655 +  | GTCACGTGACTT | C/T | single    | 0         | rs5993087  | 0.741 |
| chr22 | 17060655 -  | GTCACGTGACAG | G/A | single    | 0         | rs5993087  | 0.741 |
| chr3  | 197205362 - | CCCACGTGACCT | C/T | single    | 0         | rs4088640  | 0.741 |
| chr20 | 43974154 -  | CCCACGTGACCG | -/C | insertion | 0         | rs11372517 | 0.734 |
| chr16 | 1394798 +   | TCCACGTGACGG | A/G | single    | 0         | rs11861889 | 0.719 |
| chr1  | 153472333 - | CACATGTGACCC | C/T | single    | 0         | rs3115533  | 0.713 |
| chr1  | 783810 -    | TCCACGTGACTA | C/T | single    | 0         | rs2519031  | 0.701 |
| chr1  | 783814 -    | TCCACGTGACTA | T/G | single    | 0         | rs28493038 | 0.701 |
